# Supplementary material for: A COX2-targeting cancer-specific fluorescent probe for hydrogen sulfide detection in living cells, Caenorhabditis elegans, and zebrafish
Source: Royal Society of Chemistry journal article supplement (doi:10.1039/d3an01847d), 2024-01-01
Supplement: d3an01847d1.pdf [file d3an01847d1.pdf]

## Electronic Supplementary Information

### **COX2-targeting cancer-specific fluorescent probe for hydrogen sulfide detection in living cells, *Caenorhabditis elegans*, and zebrafish**

Fengying Yuan,<sup>b,c,†</sup> Qiao Zhao,<sup>a,†</sup> Yanyan Zeng,<sup>b</sup> Xu Fang Liao,<sup>a</sup> Jiali Li,<sup>b</sup> Bo Liu,<sup>a</sup> Jun Feng Kou,<sup>a</sup> Xiaolin Zhong,<sup>d</sup> Xiang Hua Wu,<sup>\*,a</sup> Jun Feng Zhang,<sup>\*,a</sup> and Wen Xiu Ren<sup>\*,b</sup>

<sup>a</sup>College of Chemistry and Chemical Engineering, Yunnan Normal University, Kunming 650500, China

<sup>b</sup>Department of Radiology, the Affiliated Hospital of Southwest Medical University, Luzhou 646000, China

<sup>c</sup>Functional and Molecular Imaging Key Laboratory of Sichuan Province, Chengdu 610000, China

<sup>d</sup>Department of Gastroenterology, the Affiliated Hospital of Southwest Medical University, Luzhou 646000, China

\*Corresponding Author. E-mail addresses: chxhwu@sina.com (X. H. Wu), junfengzhang78@126.com (J. F. Zhang), xrenwenxiux@swmu.edu.cn (W. X. Ren)

<sup>†</sup>F. Yuan and Q. Zhao contributed equally to this work.

## CONTENTS

1. Materials and instruments
2. Synthetic route of **COX2-H<sub>2</sub>S**
3. Mass spectrum analysis of **COX2-H<sub>2</sub>S** in the presence of H<sub>2</sub>S
4. <sup>1</sup>H-NMR, <sup>13</sup>C-NMR and MS spectra of **COX2-H<sub>2</sub>S**
5. Sample preparation and measurements
6. The quantum yield of **COX2-H<sub>2</sub>S**
7. Cell viability assay
8. Cell culture and confocal imaging
9. Time dependent fluorescent imaging of 9L/lacZ cells
10. H<sub>2</sub>S-concentration fluorescent imaging of 9L/lacZ cells
11. Intracellular co-localization of **COX2-H<sub>2</sub>S**
12. Targeted imaging of 9L/lacZ cells in the presence of RAW264.7 cells.
13. *C. elegans* and zebrafish experiments

## 1. Materials and instruments

Unless otherwise stated, all chemical reagents for synthesis were purchased from commercial suppliers and used without further purification. Flash chromatography was carried out on silica gel (200-300 mesh).  $^1\text{H}$  NMR and  $^{13}\text{C}$  NMR spectra were recorded on a Bruker Avance 500 MHz and 125 MHz spectrometer with tetramethylsilane (TMS) as internal standard, respectively (Germany). Chemical shifts were expressed in ppm and coupling constants ( $J$ ) in Hz. Mass spectra were performed with Agilent Xevo TQ-S/QTOF (USA). UV-vis absorption spectra were acquired with UV-240ZPC (Japan). Fluorescence spectra were acquired with F97XP spectrophotometer (China). The confocal fluorescence images were analyzed by a confocal laser scanning microscope (Leica SP8, Germany). The starting material **1**<sup>1</sup> was prepared by the procedures described in literature method.

## 2. Synthesis of COX2-H<sub>2</sub>S

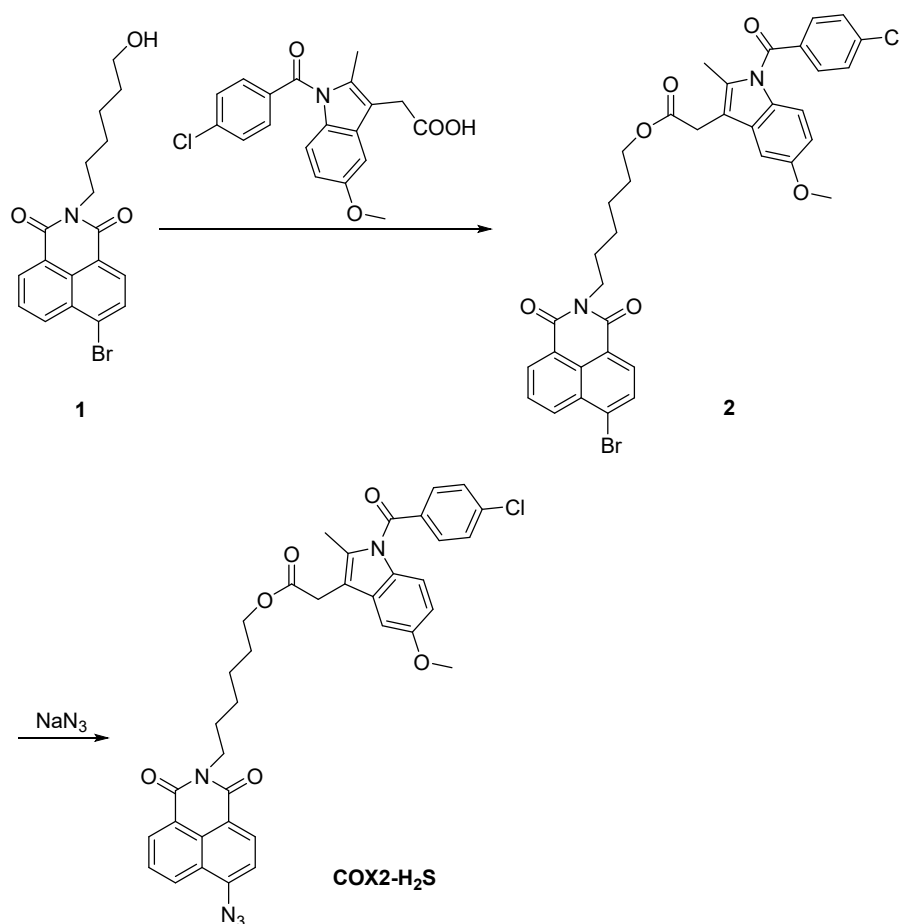

**Scheme S1.** Synthetic route of COX2-H<sub>2</sub>S

### 3. Mass spectrum analysis of COX2-H<sub>2</sub>S in the presence of H<sub>2</sub>S

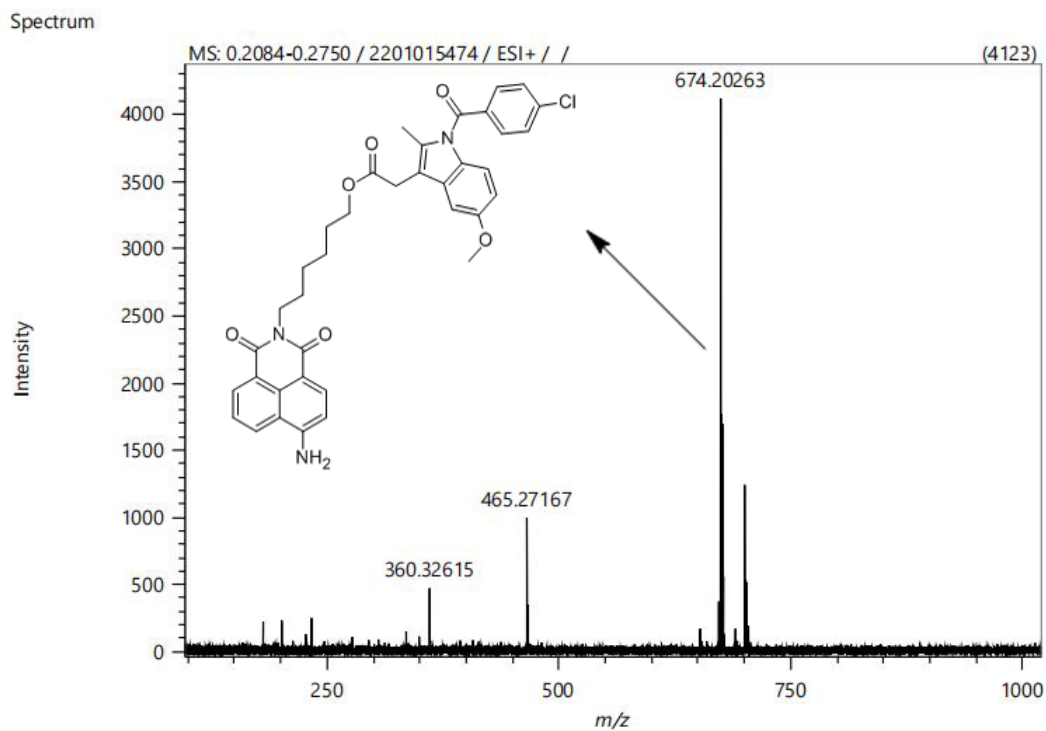

Fig. S1 The mass spectrum after reaction of COX2-H<sub>2</sub>S with H<sub>2</sub>S

### 4. <sup>1</sup>H NMR, <sup>13</sup>C NMR and MS spectra of COX2-H<sub>2</sub>S

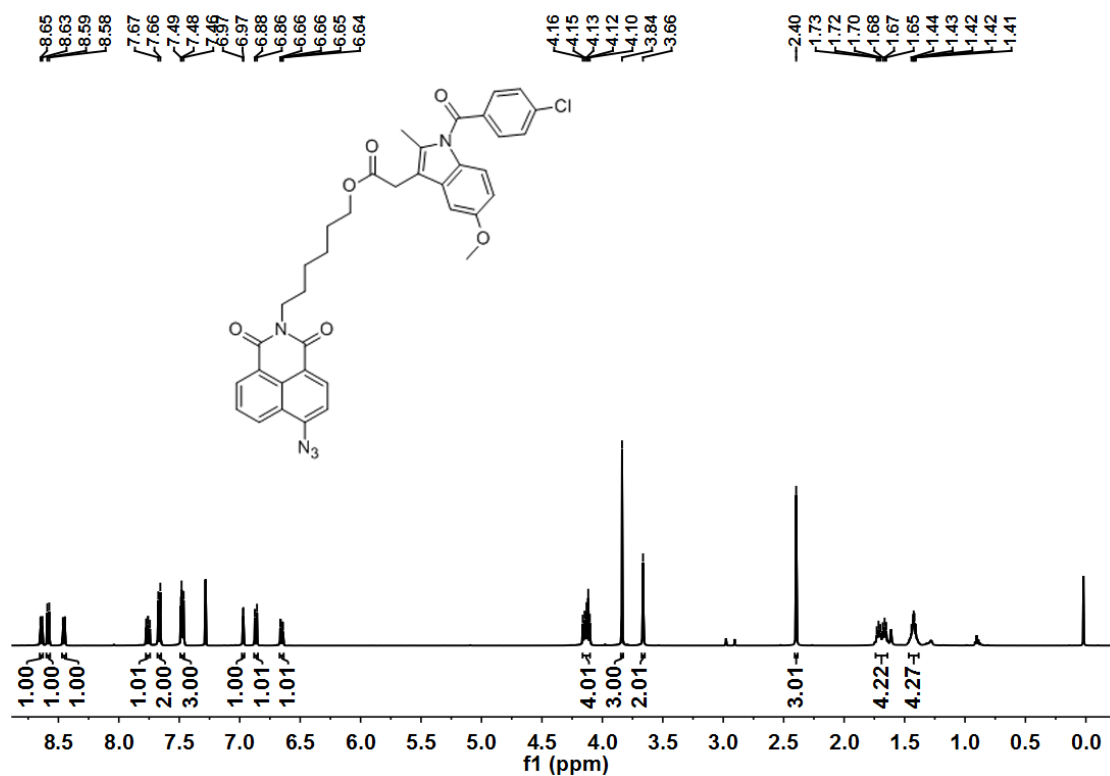

Fig. S2 <sup>1</sup>H NMR spectra of COX2-H<sub>2</sub>S in CDCl<sub>3</sub>

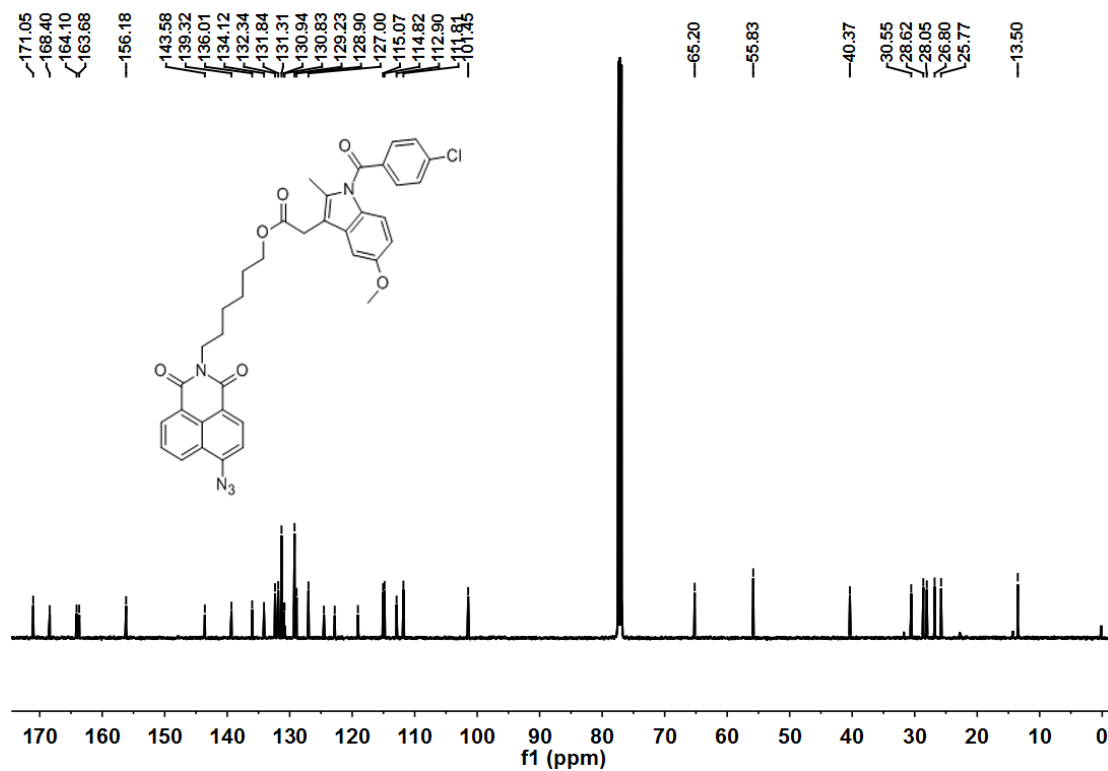

**Fig. S3** <sup>13</sup>C NMR spectra of COX2-H<sub>2</sub>S in CDCl<sub>3</sub>

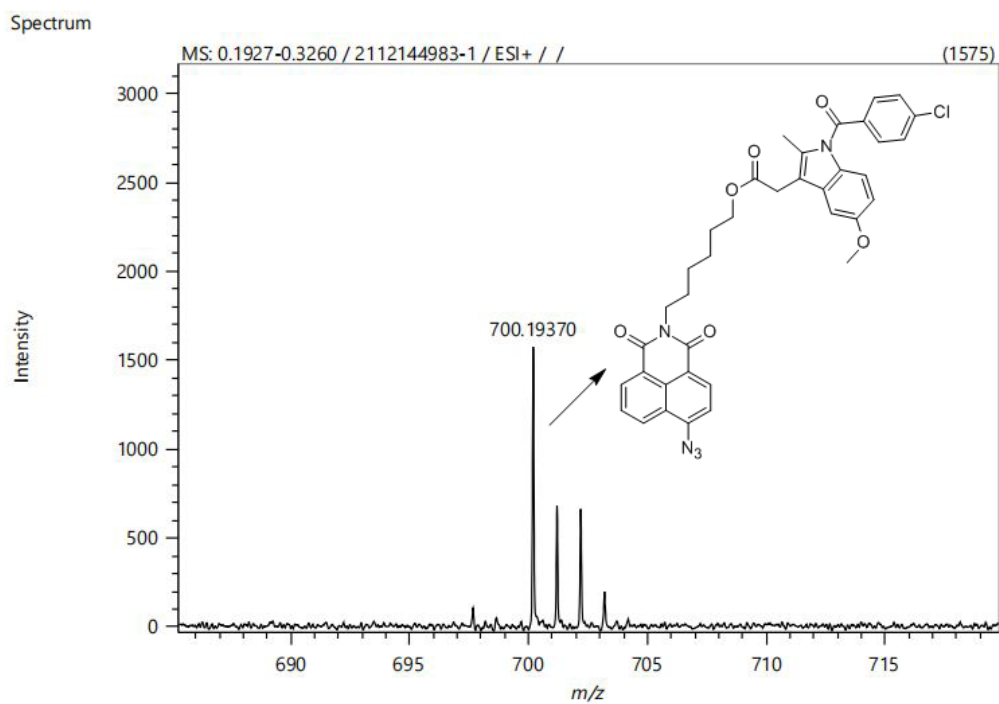

**Fig. S4** HRMS spectra of probe COX2-H<sub>2</sub>S

## 5. Sample preparation and measurements

A stock solution of COX2-H<sub>2</sub>S (2 mmol/L) was prepared by dissolving in DMSO. Fluorescence measurements were carried out in PBS (0.01 mol/L, pH 7.4, 60% DMSO)

buffer solution. Various bio-analytes ( $\text{H}_2\text{S}$ ,  $\text{S}_2\text{O}_5^{2-}$ ,  $\text{H}_2\text{O}_2$ ,  $\text{HSO}_3^-$ ,  $\text{NO}_2^-$ ,  $\text{ONOO}^-$ ,  $\text{HSO}_4^-$ ,  $^1\text{O}_2$ ,  $\text{CH}_3\text{COO}^-$ ,  $\text{SO}_3^{2-}$ ,  $\cdot\text{OH}$ ,  $\text{NO}_3^-$ , Cys, Hcy, GSH) were used for the selectivity tests.

## 6. The quantum yield ( $\Phi$ ) of COX2-H<sub>2</sub>S

Table S1 The Quantum Yield ( $\Phi$ ) of COX2-H<sub>2</sub>S

| $\lambda_{\text{ex}} = 450 \text{ nm}$ (reference: rhodamine B <sup>[2]</sup> ) |                          |                       |
|---------------------------------------------------------------------------------|--------------------------|-----------------------|
| Quantum Yield( $\Phi$ )                                                         | Without H <sub>2</sub> S | With H <sub>2</sub> S |
|                                                                                 | $\Phi = 0.0524$          | $\Phi = 0.453$        |

## 7. Cell viability assay

RAW264.7 cells and 9L/lacZ cells were cultured in DMEM supplemented with 1% penicillin-streptomycin and 10% FBS in an atmosphere of 5% CO<sub>2</sub> and 95% air at 37°C. The cells were seeded in a 96-well plate with a density of 6000 cells per well and allowed to adhere for 24 h. Subsequently, the cells were incubated with various concentrations of the probe (0, 0.5, 1, 2, 3, 4 and 5  $\mu\text{M}$ ) at 37°C in an atmosphere of 5% CO<sub>2</sub> and 95% air for 24 h. After that, 10  $\mu\text{L}$  CCK-8 reagent was added to each well and incubated for 2 h. The absorbance was measured at 450 nm on a microplate reader (Cytation5, BioTek, USA). Cell viability rate was calculated according to following equation: Viability = (mean Abs. of treated wells/mean Abs. of control wells)  $\times$  100%. Results are mean  $\pm$  SD, n = 3.

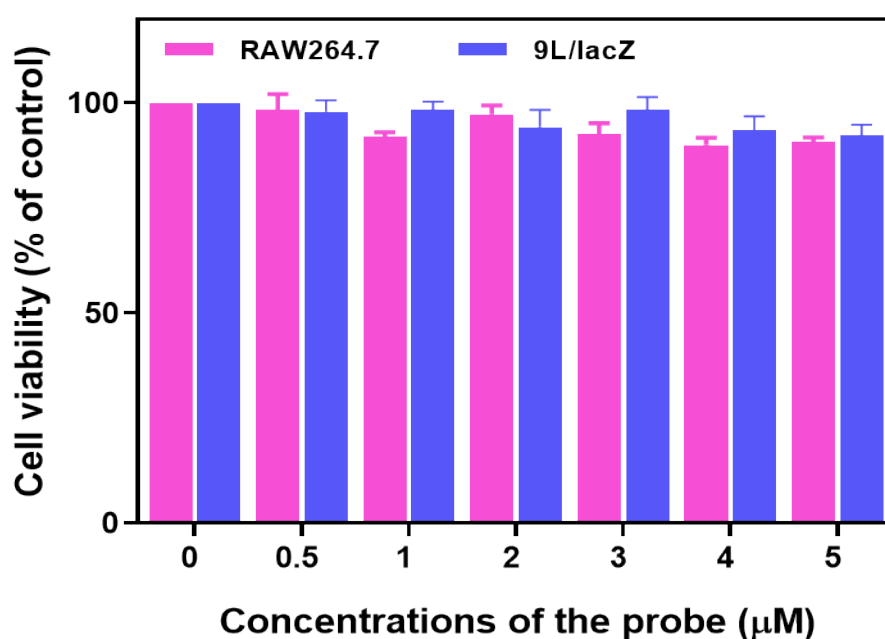

Fig. S5 Cell viability under different concentrations of COX2-H<sub>2</sub>S.

## 8. Cell culture and confocal imaging

Cells were from the Affiliated Hospital of Southwest Medical University. RAW264.7, HuH-7, DSL-6A/C1 and 9L/lacZ cells were cultured with DMEM (Gibco) and A549, KYSE150 cells were cultured with RPMI 1640 medium (Gibco), which contained with 10% fetal bovine serum (Hyclone) and 1% penicillin (100 U/mL)-streptomycin (100  $\mu\text{g/mL}$ ) (Solarbio) in a humidified incubator containing 5/95 (v/v) of  $\text{CO}_2/\text{air}$  at 37°C. Before imaging experiments, the cells were detached with a treatment of recombinant trypsin digestive fluid (BasalMedia) and suspended in culture media. Then the cells suspension were seeded in 20 mm glass confocal cell culture dishes for 24 h. Note: The cells were washed three times with PBS buffer before proceeding to the next step. The confocal fluorescence images were analyzed by a confocal laser scanning microscope (Leica SP8, Germany). The excitation wavelength was 448 nm and 552 nm, and the emission was collected by a 500-600 nm and 620-680 nm long pass filters, respectively. All fluorescence images were obtained by a confocal laser scanning microscope at magnification (5x, 10x and 63x). Fluorescence images were analyzed using ImageJ software.

### 9. Time dependent fluorescent imaging of 9L/lacZ cells

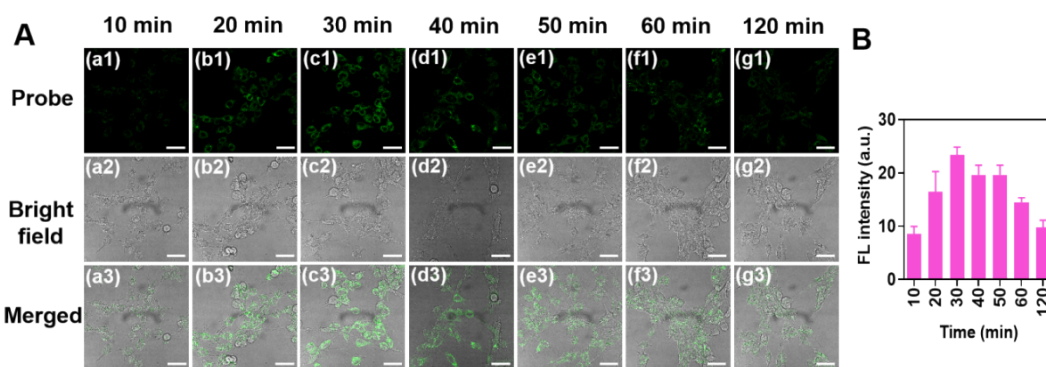

**Fig. S6** Time dependent confocal laser scanning microscopy images of 9L/lacZ cells. (A) 9L/lacZ cells were treated with 0.5  $\mu\text{mol/L}$  probe for 10 min, 20 min, 30 min, 40 min, 50 min, 1 h, 2 h, respectively.  $\lambda_{\text{ex}} = 448 \text{ nm}$ ,  $\lambda_{\text{em}} = 500\text{--}600 \text{ nm}$ . (B) The semi-quantitative analysis of fluorescence images in a1-g1. Scale bar: 25  $\mu\text{m}$ . pH = 7.2.

### 10. $\text{H}_2\text{S}$ -concentration fluorescent imaging of 9L/lacZ cells

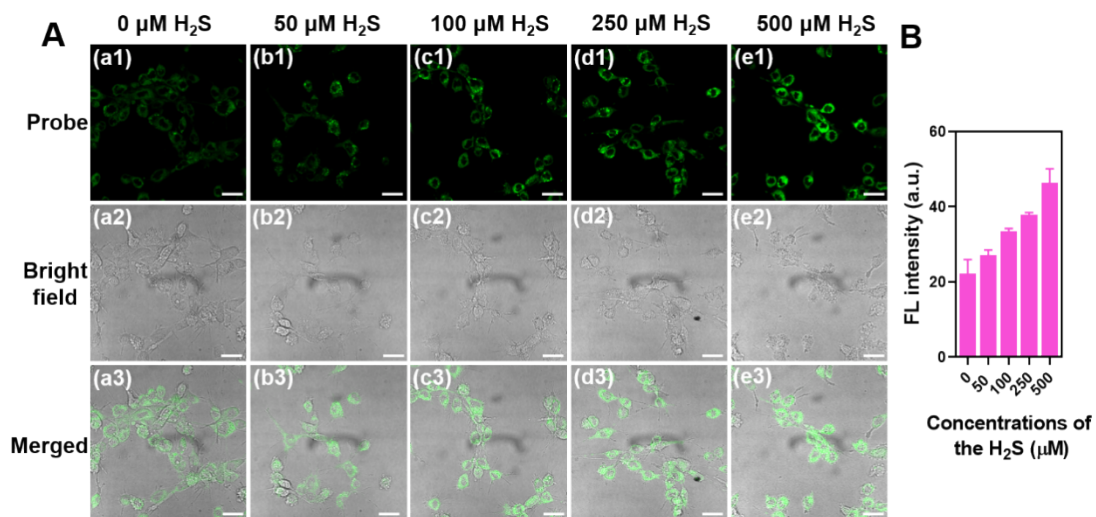

**Fig. S7** Fluorescence imaging of H<sub>2</sub>S in 9L/lacZ cells. (A) (a1-e1) Fluorescence images, (a2-e2) Bright field images and (a3-e3) Merged images. (a1-e3) Probe-treated (0.5 μmol/L, 30 min) 9L/lacZ cells incubated with H<sub>2</sub>S (0 μmol/L, 50 μmol/L, 100 μmol/L, 250 μmol/L, 500 μmol/L) for 1 h, respectively.  $\lambda_{ex} = 448$  nm,  $\lambda_{em} = 500-600$  nm. (B) The semi-quantitative analysis of fluorescence images. FL: Fluorescence. Scale bar: 25 μm. pH = 7.2.

### 11. Intracellular co-localization of COX2-H<sub>2</sub>S

Probe and Tracker intracellular co-localization fluorescence imaging of 9L/lacZ cells. 9L/lacZ cells were pre-stained with 100 nmol/L MitoRed (Keygen, KGMP0071,  $\lambda_{ex} = 579$  nm,  $\lambda_{em} = 600$  nm) for 30 min, 1 μmol/L ER-Red (Keygen, KGMP016-1,  $\lambda_{ex} = 587$  nm,  $\lambda_{em} = 615$  nm) for 30 min and 1 μmol/L LysoRed (Keygen, KGMP006,  $\lambda_{ex} = 575$  nm,  $\lambda_{em} = 600$  nm) for 1 h, respectively. Then, the cells were washed three times with PBS buffer, incubated with the probe (0.5 μmol/L, 30 min) and washed with PBS buffer three times again for imaging.



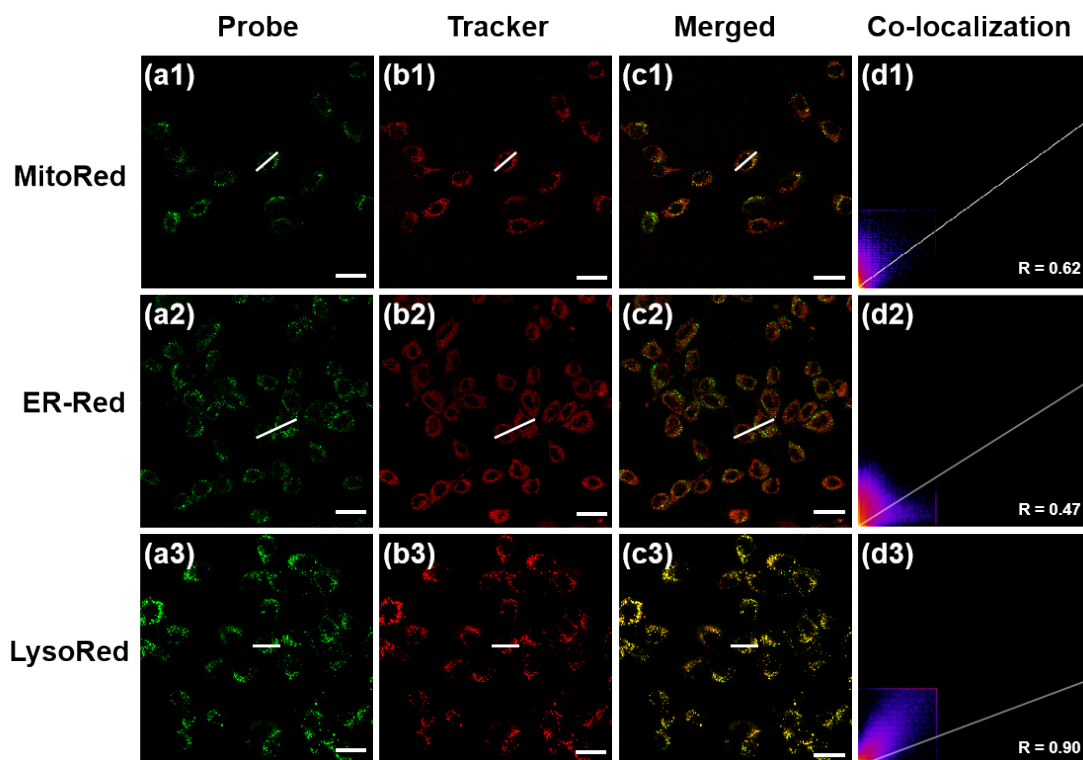

**Fig. S8** Co-localization fluorescence images of the probe COX2-H<sub>2</sub>S and tracker in 9L/lacZ. (a1-a3) Fluorescence images of the probe, (b1-b3) Fluorescence images of tracker, (c1-c3) Merged images. (d) Intensity correlation plot of the probe and commercial dyes. Green channel:  $\lambda_{\text{ex}} = 448$  nm,  $\lambda_{\text{em}} = 500\text{--}600$  nm; Red channel:  $\lambda_{\text{ex}} = 552$  nm,  $\lambda_{\text{em}} = 620\text{--}680$  nm. Scale bar: 25  $\mu\text{m}$ . pH = 7.2.

## 12. Targeted imaging of 9L/lacZ cells in the presence of RAW264.7 cells.

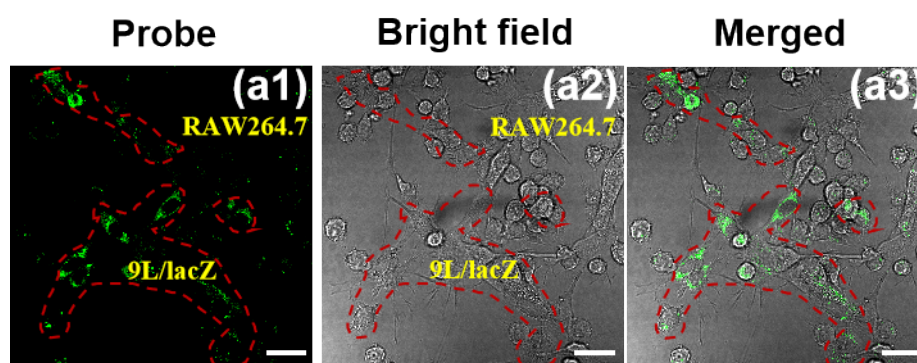

**Fig. S9** Confocal laser scanning microscopy images of co-cultured RAW264.7 cells and 9L/lacZ cells. (a1) Fluorescence images, (a2) Bright field images, (a3) Merged images. Scale bar: 25  $\mu\text{m}$ . pH = 7.2.

## 13. *C. elegans* and zebrafish experiments

5-day-old wild-type *C. elegans* were obtained from the School of Pharmacy at South West Medical University (Luzhou, China). *C. elegans* incubated with the probe (10  $\mu\text{mol/L}$ ) for 1 h. *C. elegans* preloaded on the probe and further incubated in PBS

buffer with H<sub>2</sub>S (500 μM, 1 h).

2-day-old zebrafish were obtained from the Public Experimental Technology Center at South West Medical University (Luzhou, China). Zebrafish only incubated with 10 μM probe for 1 h. Probe-treated zebrafish incubated with 500 μmol/L H<sub>2</sub>S for 1 h.

**Reference:**

1. J. Lee, H. S. Kim, P. Jangili, H. G. Kang, A. Sharma and J. S. Kim, *ACS Appl. Bio Mater.*, 2021, **4**, 2073–2079.
2. A. M. Brouwer, *Pure Appl. Chem.*, 2011, **83**, 2213–2228.
